# Supplementary material for: Intranasal ChAdOx1 nCoV-19/AZD1222 vaccination reduces viral shedding after SARS-CoV-2 D614G challenge in preclinical models
Source: PubMed Central journal article supplement (PMC9267380; doi:10.1126/scitranslmed.abh0755), 2021-08-18
Supplement: scitranslmed.abh0755_sm.pdf [file scitranslmed.abh0755_sm.pdf]

Supplementary Materials for

**Intranasal ChAdOx1 nCoV-19/AZD1222 vaccination reduces viral shedding after SARS-CoV-2 D614G challenge in preclinical models**

Neeltje van Doremalen *et al.*

Corresponding author: Vincent J. Munster, [vincent.munster@nih.gov](mailto:vincent.munster@nih.gov)

*Sci. Transl. Med.* **13**, eabh0755 (2021)  
DOI: 10.1126/scitranslmed.abh0755

**The PDF file includes:**

Figs. S1 and S2  
Tables S1 and S2

**Other Supplementary Material for this manuscript includes the following:**

Data file S1

## Supplementary Materials

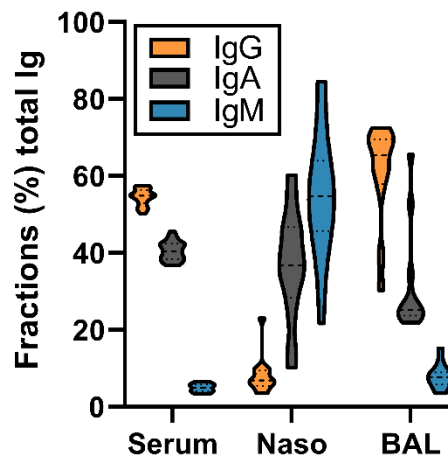

**Fig. S1. Fractions of IgA, IgG, and IgM in serum, nasosorption (Naso) or bronchoalveolar lavage (BAL) samples obtained from NHPs at different timepoints from both groups throughout the experiment.** Twenty-four serum, 14 nasosorption, and 12 BAL samples were measured by the isotyping panel 1 kit and calculated as a fraction of the total Ig. Data are presented as violin plots showing median and quartiles.

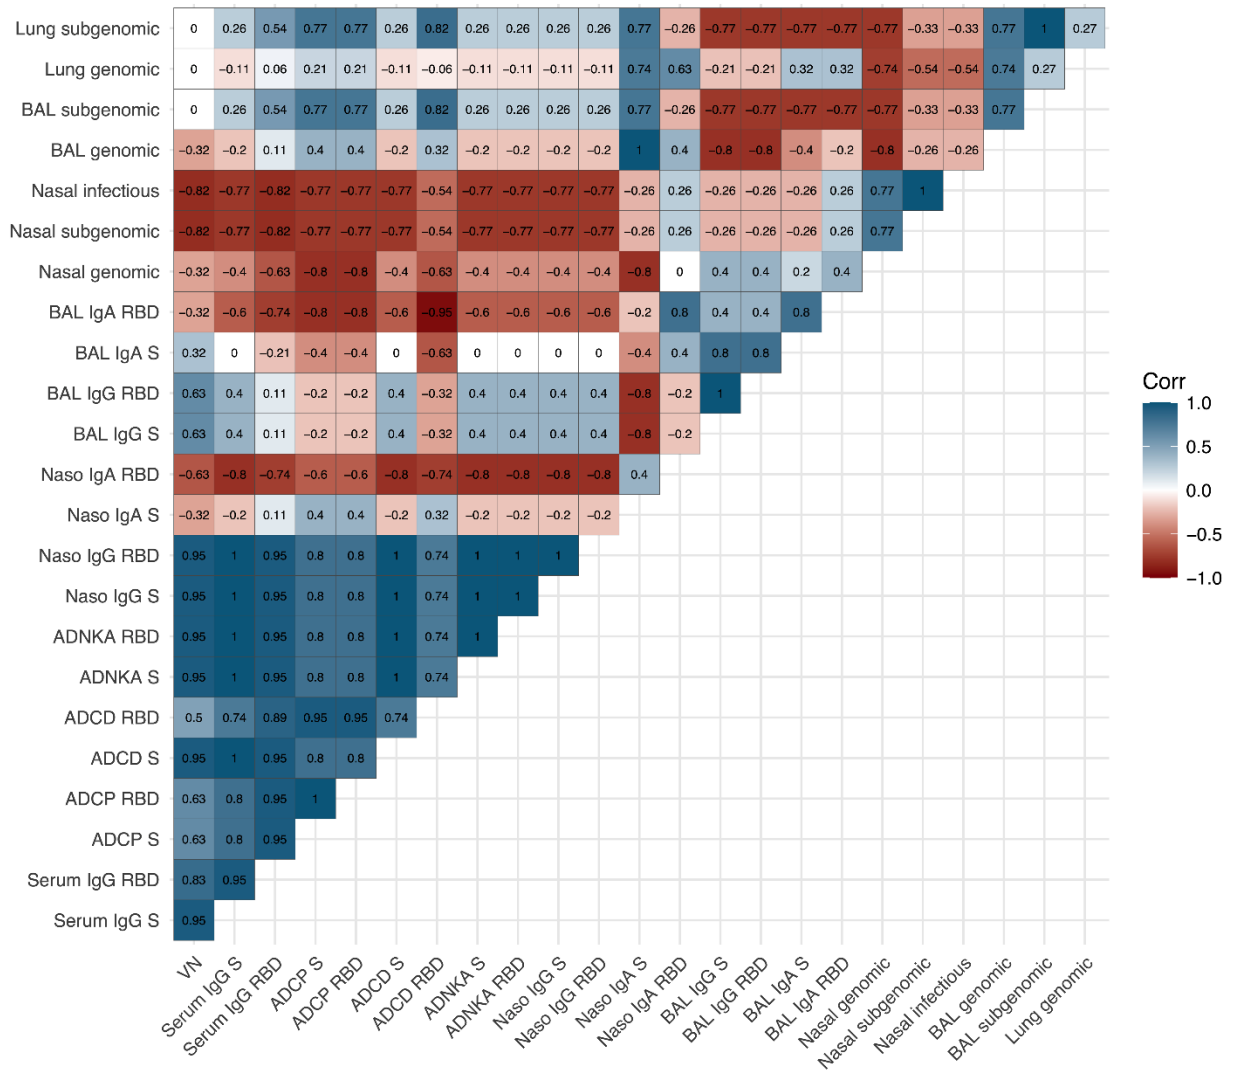

**Fig. S2. Correlation matrix featuring all immunology and virology measures.** Correlation heatmap, depicted as a matrix, representing pairwise correlations between all antibody and virology variables in IN-vaccinated animals. The two-sided Spearman rank correlation coefficient is indicated within each square. BAL, bronchoalveolar lavage; S, spike protein; RBD, receptor binding domain; ADNKA, antibody-dependent natural killer cell activation; ADCD, antibody-dependent complement deposition; ADCP, antibody-dependent cellular phagocytosis; VN, virus neutralization.

**Table S1. Pathology and immunohistochemistry (IHC) scoring for direct challenge hamster samples.** Hematoxylin and Eosin (H&E) stained samples were scored as follows: 0 = not present; 1 = 1-10%; 2 = 11-25%; 3 = 26-50%; 4 = 51-75%; 5 = 76-100%. IHC was scored as follows: 0 = not present; 1 = rare/few; 2 = scattered; 3 = moderate; 4 = numerous; 5 = diffuse. IN, intranasal; IM, intramuscular.

|     |                                     | IN-vaccinated animals |   |   |   | IM-vaccinated animals |   |   |   | Control animals |    |    |    |
|-----|-------------------------------------|-----------------------|---|---|---|-----------------------|---|---|---|-----------------|----|----|----|
|     |                                     |                       |   |   |   |                       |   |   |   |                 |    |    |    |
| H&E | Lesions %                           | 0                     | 0 | 0 | 0 | 0                     | 0 | 0 | 0 | 70              | 60 | 40 | 70 |
|     | Interstitial pneumonia              | 0                     | 0 | 0 | 0 | 0                     | 0 | 0 | 0 | 4               | 4  | 3  | 4  |
|     | Bronchiolitis                       | 0                     | 0 | 0 | 0 | 0                     | 0 | 0 | 0 | 2               | 2  | 3  | 3  |
|     | Alveolar exudate                    | 0                     | 0 | 0 | 0 | 0                     | 0 | 0 | 0 | 2               | 2  | 2  | 2  |
|     | Type II pneumocyte hyperplasia      | 0                     | 0 | 0 | 0 | 0                     | 0 | 0 | 0 | 2               | 2  | 3  | 2  |
|     | Perivascular leukocyte infiltration | 0                     | 0 | 0 | 0 | 0                     | 0 | 0 | 0 | 2               | 2  | 2  | 2  |
|     | Edema                               | 0                     | 0 | 0 | 0 | 0                     | 0 | 0 | 0 | 2               | 2  | 1  | 3  |
| IHC | Staining %                          | 0                     | 0 | 0 | 0 | 0                     | 0 | 0 | 0 | 70              | 60 | 20 | 70 |
|     | Type I and II pneumocytes           | 0                     | 0 | 0 | 0 | 0                     | 0 | 0 | 0 | 4               | 4  | 3  | 4  |
|     | Exudate                             | 0                     | 0 | 0 | 0 | 0                     | 0 | 0 | 0 | 1               | 0  | 1  | 1  |
|     | Bronchiolar epithelium              | 0                     | 0 | 0 | 0 | 0                     | 0 | 0 | 0 | 3               | 1  | 2  | 3  |

**Table S2. Pathology and immunohistochemistry (IHC) scoring for transmission hamster samples.** Hematoxylin and Eosin (H&E) stained samples were scored as follows: 0 = not present; 1 = 1-10%; 2 = 11-25%; 3 = 26-50%; 4 = 51-75%; 5 = 76-100%. IHC was scored as follows: 0 = not present; 1 = rare/few; 2 = scattered; 3 = moderate; 4 = numerous; 5 = diffuse. IN, intranasal; IM, intramuscular.

|     |                                     | IN-vaccinated animals |   |   |   | IM-vaccinated animals |    |    |   | Control animals |    |    |    |
|-----|-------------------------------------|-----------------------|---|---|---|-----------------------|----|----|---|-----------------|----|----|----|
|     |                                     |                       |   |   |   |                       |    |    |   |                 |    |    |    |
| H&E | Lesions %                           | 0                     | 0 | 0 | 0 | 0                     | 20 | 10 | 5 | 50              | 50 | 50 | 40 |
|     | Interstitial pneumonia              | 0                     | 0 | 0 | 0 | 0                     | 3  | 3  | 2 | 3               | 3  | 3  | 3  |
|     | Bronchiolitis                       | 0                     | 0 | 0 | 0 | 0                     | 0  | 0  | 0 | 3               | 2  | 2  | 2  |
|     | Alveolar exudate                    | 0                     | 0 | 0 | 0 | 0                     | 2  | 1  | 2 | 2               | 3  | 2  | 2  |
|     | Type II pneumocyte hyperplasia      | 0                     | 0 | 0 | 0 | 0                     | 3  | 1  | 0 | 2               | 2  | 1  | 1  |
|     | Perivascular leukocyte infiltration | 0                     | 0 | 0 | 0 | 0                     | 0  | 2  | 0 | 1               | 1  | 1  | 2  |
|     | Edema                               | 0                     | 0 | 0 | 0 | 0                     | 0  | 0  | 0 | 3               | 1  | 2  | 2  |
| IHC | Staining %                          | 0                     | 0 | 0 | 0 | 0                     | 5  | 5  | 5 | 60              | 60 | 50 | 30 |
|     | Type I and II pneumocytes           | 0                     | 0 | 0 | 0 | 0                     | 1  | 1  | 1 | 4               | 4  | 4  | 2  |
|     | Exudate                             | 0                     | 0 | 0 | 0 | 0                     | 2  | 0  | 0 | 1               | 1  | 1  | 1  |
|     | Bronchiolar epithelium              | 0                     | 0 | 0 | 0 | 0                     | 1  | 1  | 0 | 3               | 1  | 2  | 3  |
